# Supplementary material for: Network structure of SnO2 hollow sphere/PANI nanocomposites for electrochemical performance
Source: Royal Society of Chemistry journal article supplement (doi:10.1039/c8dt00056e), 2018-01-01
Supplement: c8dt00056e1.pdf [file c8dt00056e1.pdf]

Electronic Supplementary Information for:

**Network structure of SnO<sub>2</sub> hollow spheres/PANI  
nanocomposites for electrochemical performance**

*Qianqian Wang, Quan Zong, Chunlei Zhang, Hui Yang*

*and Qilong Zhang\**

School of Materials Science and Engineering, State Key Lab Silicon Mat, Zhejiang  
University, Hangzhou 310027, PR China. Email: mse237@zju.edu.cn

**Table S1.** Summary of electrochemical measurements reported in recent papers for SnO<sub>2</sub>/PANI nanocomposite supercapacitor electrodes.

| morphology                                                                         | Content of SnO <sub>2</sub> in composite | Current collector   | Electrolyte                          | The potential window | Current density       | Maximum Specific        | Ref (year)       |
|------------------------------------------------------------------------------------|------------------------------------------|---------------------|--------------------------------------|----------------------|-----------------------|-------------------------|------------------|
| 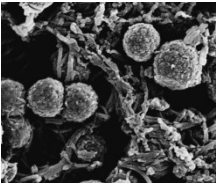   | 53.75%                                   | Graphite sheet      | 1M H <sub>2</sub> SO <sub>4</sub>    | 0-1 V                | 1 A g <sup>-1</sup>   | 477 F g <sup>-1</sup>   | This work (2017) |
|    | -                                        | NRA electrode       | H <sub>2</sub> SO <sub>4</sub> -PVA  | -0.2-0.6V            | 0.5 A g <sup>-1</sup> | 367.5 F g <sup>-1</sup> | Ref.23 (2017)    |
|   | 81.3%                                    | Graphite sheet      | 1M H <sub>2</sub> SO <sub>4</sub>    | 0-1 V                | 0.1 A g <sup>-1</sup> | 335.5 F g <sup>-1</sup> | Ref.24 (2014)    |
|  | -                                        | Stainless steel net | 1M H <sub>2</sub> SO <sub>4</sub>    | -0.5-0.5 V           | 0.5 A g <sup>-1</sup> | 501 F g <sup>-1</sup>   | Ref.25 (2014)    |
|  | -                                        | Carbon paper        | 0.5 M H <sub>2</sub> SO <sub>4</sub> | 0-0.8 V              | 1 A g <sup>-1</sup>   | 295.5 F g <sup>-1</sup> | Ref.26 (2014)    |

23. Y. Xie and F. Zhu, *Journal of Solid State Electrochemistry*, 2017, **21**, 1675-1685.
24. L. Wang, L. Chen, B. Yan, C. Wang, F. Zhu, X. Jiang, Y. Chao and G. Yang, *Journal of Materials Chemistry A*, 2014, **2**, 8334-8341.
25. Z. Luo, Y. Zhu, E. Liu, T. Hu, Z. Li, T. Liu and L. Song, *Materials Research Bulletin*, 2014, **60**, 105-110.
26. X. Shen, L. Ma, M. Gan, Z. Li, J. Yan, S. Xie, H. Yin and J. Zhang, *Synthetic Metals*, 2014, **196**, 20-26.

**Table S2.** Maximum specific capacitance of SnO<sub>2</sub>/PANI nanocomposite fabricated through different preparation process.

| Hydrothermal reaction time    |       | 10h SnO <sub>2</sub>    |                                         |                                          | 12h SnO <sub>2</sub>   |                                         |                                          |
|-------------------------------|-------|-------------------------|-----------------------------------------|------------------------------------------|------------------------|-----------------------------------------|------------------------------------------|
| Oxidizer<br>And reaction time |       | APS<br>4h               | KH(IO <sub>3</sub> ) <sub>2</sub><br>4h | KH(IO <sub>3</sub> ) <sub>2</sub><br>12h | APS<br>4h              | KH(IO <sub>3</sub> ) <sub>2</sub><br>4h | KH(IO <sub>3</sub> ) <sub>2</sub><br>12h |
| m:<br>SnO <sub>2</sub>        | 30mg  | 231.3 F g <sup>-1</sup> | -                                       | 121.7F g <sup>-1</sup>                   | 310.0F g <sup>-1</sup> | -                                       | 137.2F g <sup>-1</sup>                   |
|                               | 50mg  | 261.2F g <sup>-1</sup>  | 167.7F g <sup>-1</sup>                  | 96.1F g <sup>-1</sup>                    | 477.0F g <sup>-1</sup> | 35.0F g <sup>-1</sup>                   | 75.9F g <sup>-1</sup>                    |
|                               | 100mg | 211.5F g <sup>-1</sup>  | 52.9 F g <sup>-1</sup>                  | 42.6F g <sup>-1</sup>                    | 135.2F g <sup>-1</sup> | 18.9F g <sup>-1</sup>                   | 45.5F g <sup>-1</sup>                    |
|                               | 150mg | 101.9F g <sup>-1</sup>  | 64.1 F g <sup>-1</sup>                  | 32.1F g <sup>-1</sup>                    | 121.9F g <sup>-1</sup> | 15.3F g <sup>-1</sup>                   | 29.6F g <sup>-1</sup>                    |

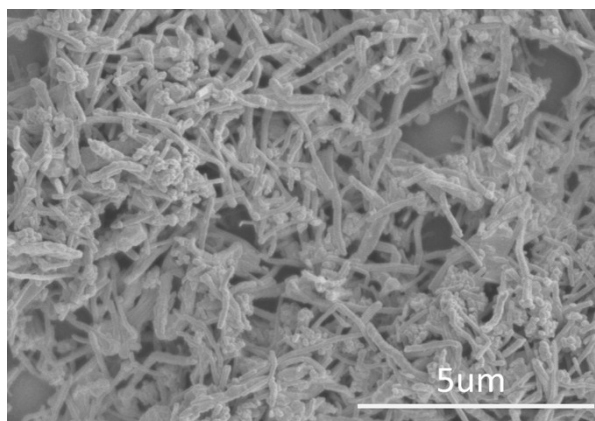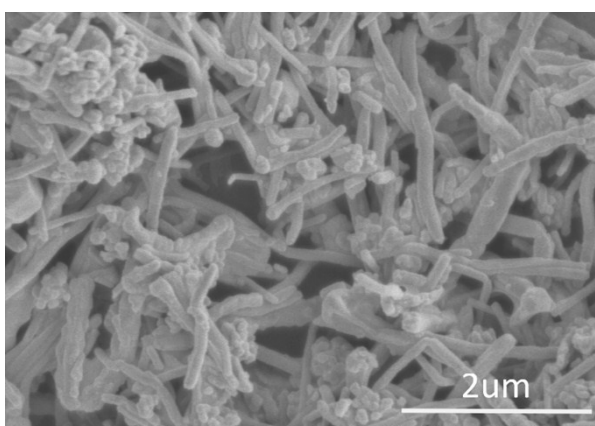

**Figure. S1** SEM images of pure PANI.

To provide more straightforward specific capacitance evaluation of the hollow spheres, we synthesized SnO<sub>2</sub> solid spheres in same size by reducing the hydrothermal treatment time from 12h to 6h.

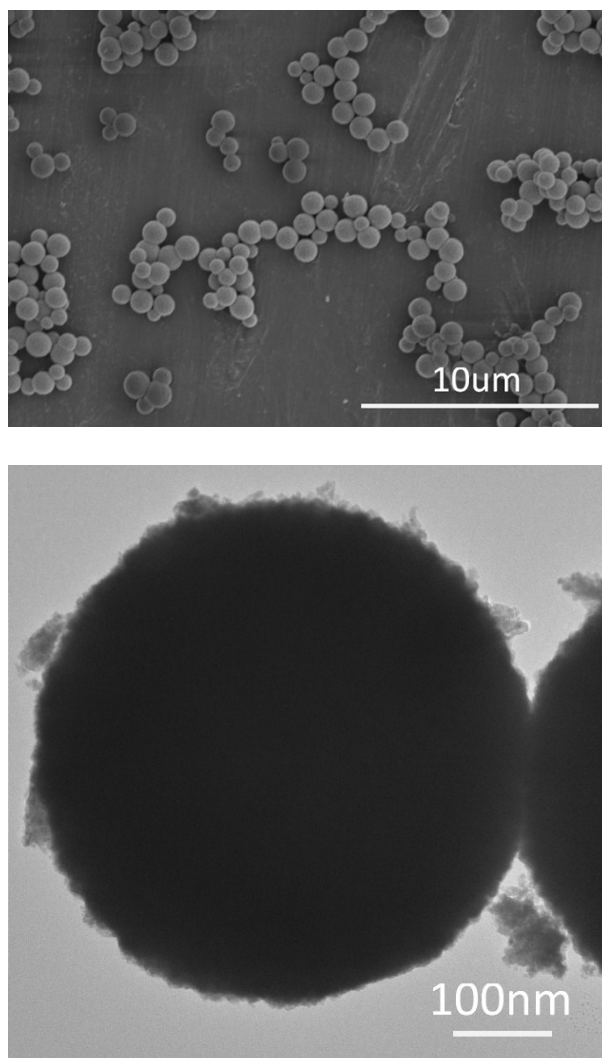

**Figure. S2** SEM and TEM images of SnO<sub>2</sub> solid spheres.

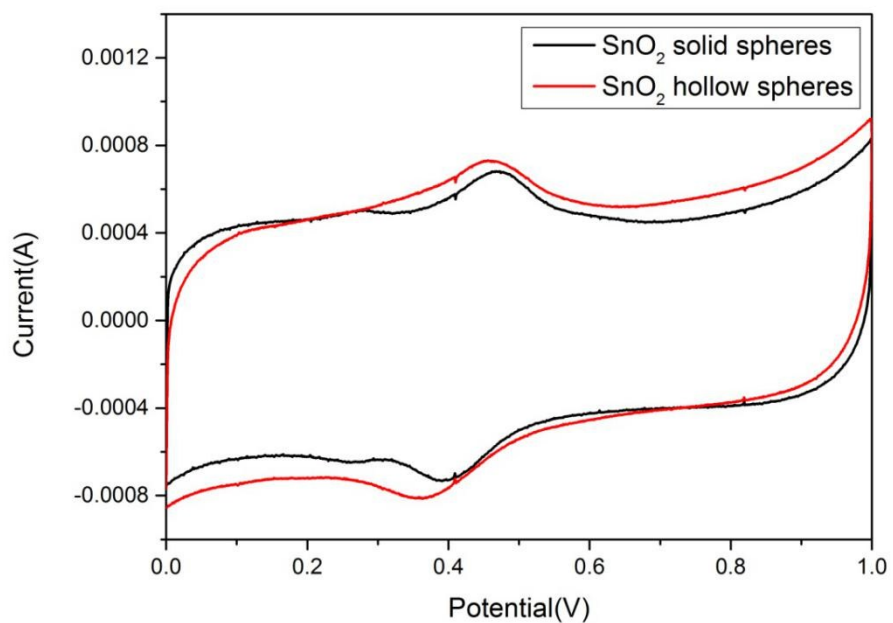

**Figure. S3** Representative CV curves of the SnO<sub>2</sub> solid spheres and SnO<sub>2</sub> hollow

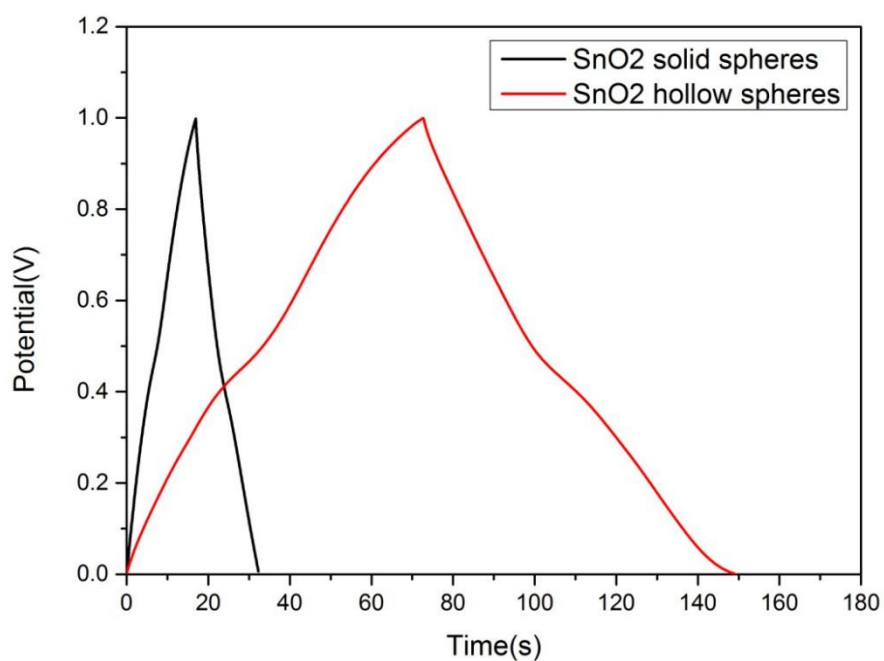

spheres electrodes tested in 1M H<sub>2</sub>SO<sub>4</sub> electrolyte at a scan rate of 50 mv s<sup>-1</sup>.

**Figure. S4** Charge-discharge curves of the SnO<sub>2</sub> solid spheres and SnO<sub>2</sub> hollow spheres electrodes at a current density of 1 A g<sup>-1</sup>.

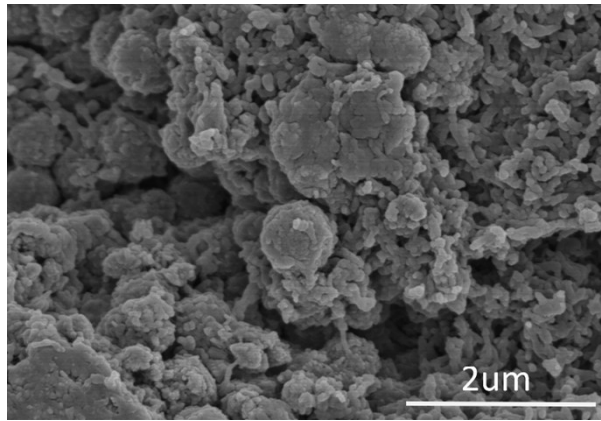

**Figure. S5** The SEM image of SnO<sub>2</sub>-PANI sample after 3000 cycles.
